# Supplementary material for: Potential markers of cancer stem-like cells in ESCC: a review of the current knowledge
Source: Frontiers journal article supplement (doi:10.3389/fonc.2023.1324819), 2024-01-04
Supplement: Data_Sheet_1.PDF [file Data_Sheet_1.PDF]

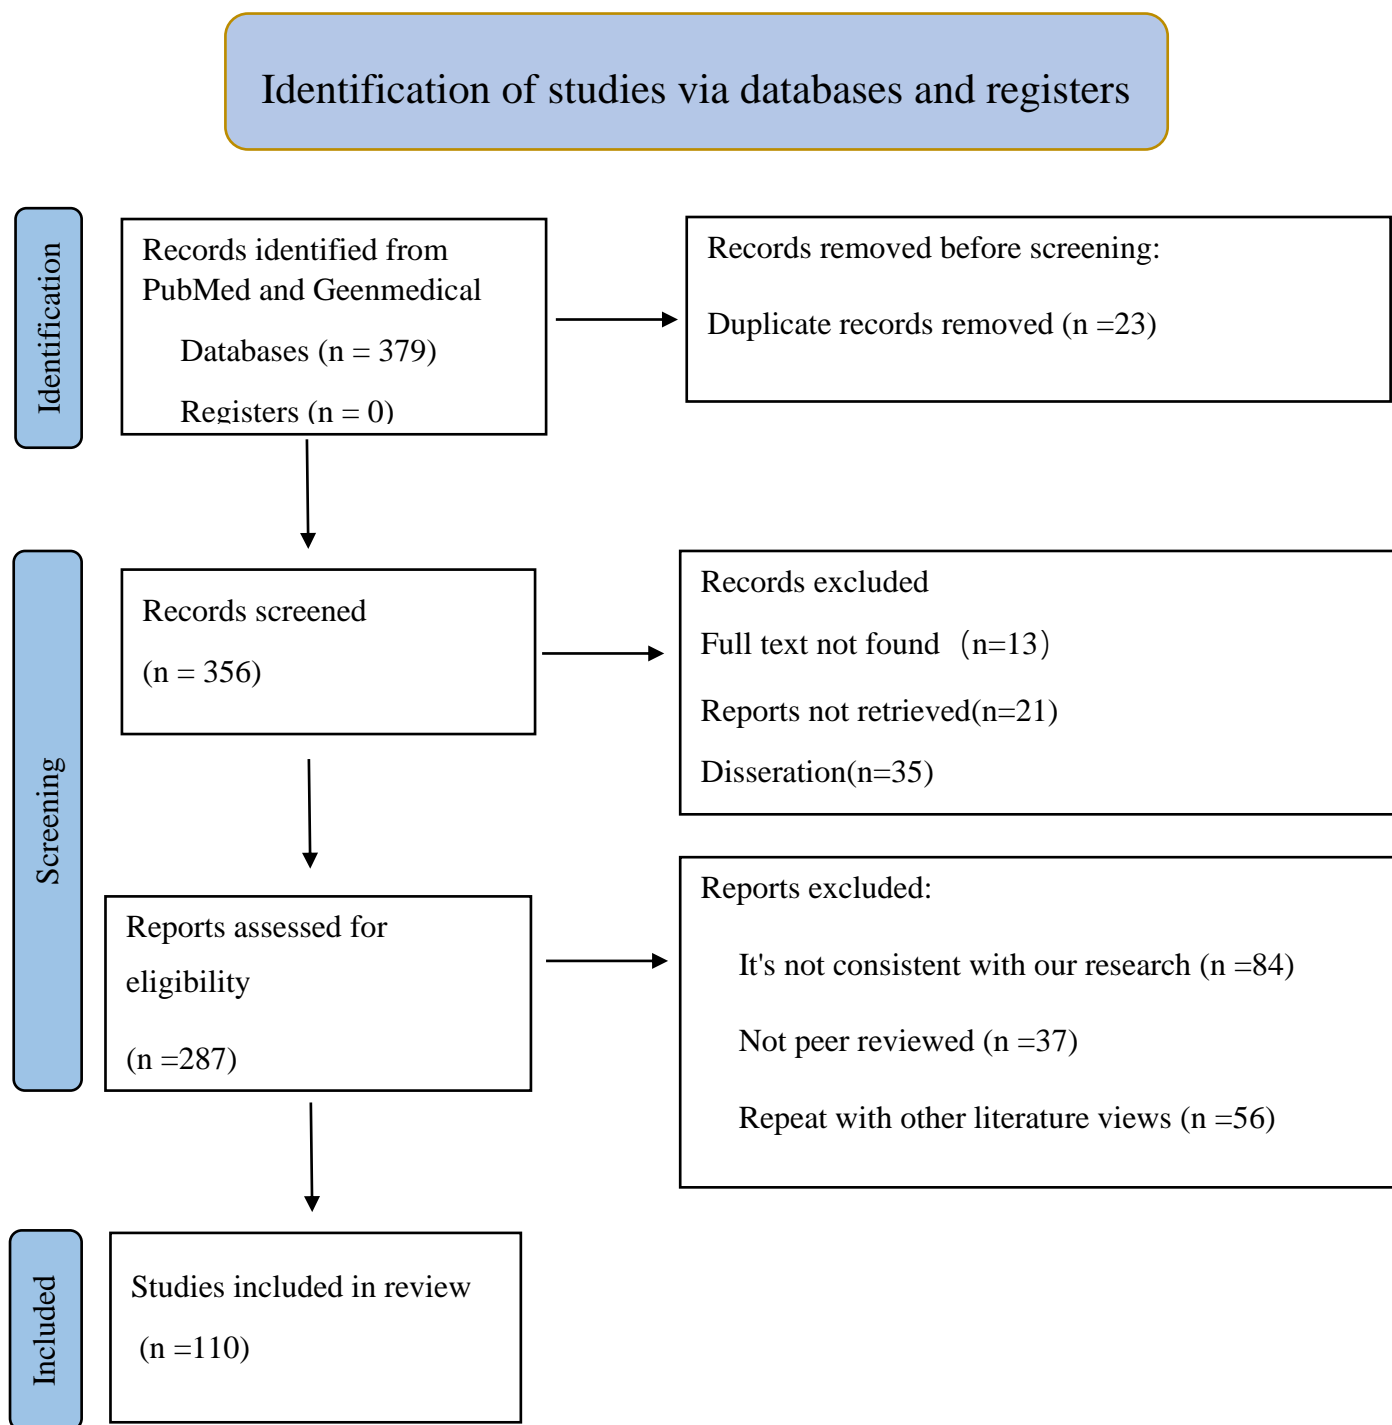

\*Consider, if feasible to do so, reporting the number of records identified from each database or register searched (rather than the total number across all databases/registers).

\*\*If automation tools were used, indicate how many records were excluded by a human and how many were excluded by automation tools.

From: Page MJ, McKenzie JE, Bossuyt PM, Boutron I, Hoffmann TC, Mulrow CD, et al. The PRISMA 2020 statement: an updated guideline for reporting systematic reviews. BMJ 2021;372:n71. doi: 10.1136/bmj.n71

For more information, visit: <http://www.prisma-statement.org/>
